# Supplementary material for: Testing the Robust Yield Estimation Method for Winter Wheat, Corn, Rapeseed, and Sunflower with Different Vegetation Indices and Meteorological Data
Source: MDPI journal article supplement (doi:10.3390/rs14122860), 2022-06-15
Supplement: s1 [file s1]

Table S2. The correlation values ( $R^2$ ) for different curve fitting methods for GARI vegetation index for corn (country level, 30% cloud coverage threshold), where “Avg. width” is the averaging or smoothing interval width in days. (The best result is in bold.)

| Avg.<br>width | Lagrange,<br>2 <sup>nd</sup> degree | Lagrange,<br>3 <sup>rd</sup> degree | Lagrange<br>4 <sup>th</sup> degree | Smoothed | Cubic<br>spline | Raw   | Double-<br>Gaussian |
|---------------|-------------------------------------|-------------------------------------|------------------------------------|----------|-----------------|-------|---------------------|
| 10            | 0.873                               | 0.875                               | 0.876                              | 0.847    | 0.876           | 0.856 | 0.853               |
| 20            | 0.869                               | 0.870                               | 0.870                              | 0.845    | 0.876           |       |                     |
| 30            | 0.870                               | 0.871                               | 0.881                              | 0.840    | 0.885           |       |                     |
| 40            | 0.872                               | 0.864                               | 0.866                              | 0.835    | 0.876           |       |                     |
| 50            | 0.881                               | <b>0.888</b>                        | 0.883                              | 0.832    | 0.878           |       |                     |
| 60            | 0.857                               | 0.865                               | 0.865                              | 0.830    | 0.865           |       |                     |
