# Supplementary material for: Testing the Robust Yield Estimation Method for Winter Wheat, Corn, Rapeseed, and Sunflower with Different Vegetation Indices and Meteorological Data
Source: MDPI journal article supplement (doi:10.3390/rs14122860), 2022-06-15
Supplement: s1 [file s1]

Table S1. Starting ( $d_b$ ) and final days ( $d_e$ ) of averaging of the 91 meteorological datasets.

| $d_e - d_b$ | $d_b$                                                       | number of datasets |
|-------------|-------------------------------------------------------------|--------------------|
| 20          | 30, 40, 50, ... , 260, 270, 280                             | 26                 |
| 30          | 30, 45, 60, ... , 240, 255, 270                             | 17                 |
| 40          | 20, 40, 60, 80, 100, 120, 140, 160, 180, 200, 220, 240, 260 | 13                 |
| 50          | 25, 50, 75, 100, 125, 150, 175, 200, 225, 250               | 10                 |
| 60          | 20, 40, 60, 80, 100, 120, 140, 160, 180, 200, 220, 240      | 12                 |
| 100         | 25, 50, 75, 100, 125, 150, 175, 200                         | 8                  |
| 150         | 50, 100, 150                                                | 3                  |
| 200         | 50, 100                                                     | 2                  |
