# Supplementary material for: Testing the Robust Yield Estimation Method for Winter Wheat, Corn, Rapeseed, and Sunflower with Different Vegetation Indices and Meteorological Data
Source: MDPI journal article supplement (doi:10.3390/rs14122860), 2022-06-15
Supplement: s1 [file s1]

Table S3. The minimum and maximum correlation values for corn (country level) between residuals (differences between estimated and HCSO yield data) and different meteorological parameters ( $d_b$  and  $d_e$  are the starting and ending days of averaging, respectively).

| Met parameter | $d_b-d_e$ | Correlation (%) | Correlation ( $R^2$ ) |
|---------------|-----------|-----------------|-----------------------|
| $T_{\min-}$   | 240–260   | –49.06          | 0.241                 |
| $T_{\min+}$   | 180–200   | 42.91           | 0.184                 |
| $T_{\max-}$   | 250–270   | –50.43          | 0.254                 |
| $T_{\max+}$   | 180–200   | 47.44           | 0.225                 |
| $Prec-$       | 180–200   | –39.68          | 0.157                 |
| $Prec+$       | 140–160   | 40.71           | 0.166                 |
| $Rad-$        | 250–270   | –42.38          | 0.180                 |
| $Rad+$        | 160–200   | 50.38           | 0.254                 |
| $SWC_1-$      | 190–210   | –26.18          | 0.069                 |
| $SWC_1+$      | 150–170   | 42.72           | 0.182                 |
| $SWC_2-$      | 190–210   | –16.12          | 0.026                 |
| $SWC_2+$      | 150–170   | 36.79           | 0.135                 |
| $SWC_3-$      | 230–250   | –1.67           | 0.000                 |
| $SWC_3+$      | 160–180   | 27.24           | 0.074                 |
