# Supplementary material for: Testing the Robust Yield Estimation Method for Winter Wheat, Corn, Rapeseed, and Sunflower with Different Vegetation Indices and Meteorological Data
Source: MDPI journal article supplement (doi:10.3390/rs14122860), 2022-06-15
Supplement: s1 [file s1]

Table S5. The minimum and maximum correlation values for winter wheat (country level) between residuals (differences between estimated and HCSO yield data) and different meteorological parameters ( $d_b$  and  $d_e$  are the starting and ending days of averaging, respectively).

| Meteorological parameter | $d_b-d_e$ | Correlation (%) | Correlation ( $R^2$ ) |
|--------------------------|-----------|-----------------|-----------------------|
| $T_{\min-}$              | 80–100    | –15.02          | 0.023                 |
| $T_{\min+}$              | 140–180   | 65.96           | 0.435                 |
| $T_{\max-}$              | -         | -               | -                     |
| $T_{\max+}$              | 140–180   | 44.67           | 0.200                 |
| $Prec-$                  | 60–120    | –38.21          | 0.146                 |
| $Prec+$                  | 120–160   | 28.69           | 0.082                 |
| $Rad-$                   | 140–160   | –21.93          | 0.048                 |
| $Rad+$                   | 50–100    | 36.69           | 0.135                 |
| $SWC_1-$                 | 60–80     | –38.14          | 0.145                 |
| $SWC_1+$                 | 150–170   | 11.49           | 0.013                 |
| $SWC_2-$                 | 60–80     | –40.17          | 0.161                 |
| $SWC_2+$                 | 150–170   | 2.42            | 0.001                 |
| $SWC_3-$                 | 50–150    | –42.69          | 0.182                 |
| $SWC_3+$                 | -         | -               | -                     |
