# Supplementary material for: Testing the Robust Yield Estimation Method for Winter Wheat, Corn, Rapeseed, and Sunflower with Different Vegetation Indices and Meteorological Data
Source: MDPI journal article supplement (doi:10.3390/rs14122860), 2022-06-15
Supplement: s1 [file s1 › Table S4.pdf]

Table S4. The average differences for corn in 2000-2020 between estimated and HCSO yield data (t/ha) applying  $h=1$  or 2 meteorological corrections. (The best results are in bold.)

| $h = 1$     |              |              |             |             | $h = 2$ |         |        |        |          |          |          |          |          |       |
|-------------|--------------|--------------|-------------|-------------|---------|---------|--------|--------|----------|----------|----------|----------|----------|-------|
|             | $T_{\min-}$  | $T_{\min+}$  | $T_{\max-}$ | $T_{\max+}$ | $Prec-$ | $Prec+$ | $Rad-$ | $Rad+$ | $SWC_1-$ | $SWC_1+$ | $SWC_2-$ | $SWC_2+$ | $SWC_3-$ |       |
| $T_{\min-}$ | <b>0.348</b> |              |             |             |         |         |        |        |          |          |          |          |          |       |
| $T_{\min+}$ | 0.407        | 0.298        |             |             |         |         |        |        |          |          |          |          |          |       |
| $T_{\max-}$ | 0.360        | 0.357        | 0.346       |             |         |         |        |        |          |          |          |          |          |       |
| $T_{\max+}$ | 0.373        | <b>0.297</b> | 0.398       | 0.309       |         |         |        |        |          |          |          |          |          |       |
| $Prec-$     | 0.390        | 0.351        | 0.346       | 0.322       | 0.352   |         |        |        |          |          |          |          |          |       |
| $Prec+$     | 0.378        | 0.321        | 0.338       | 0.318       | 0.302   | 0.369   |        |        |          |          |          |          |          |       |
| $Rad-$      | 0.394        | 0.323        | 0.380       | 0.403       | 0.343   | 0.349   | 0.327  |        |          |          |          |          |          |       |
| $Rad+$      | 0.363        | 0.356        | 0.324       | 0.363       | 0.335   | 0.389   | 0.354  | 0.364  |          |          |          |          |          |       |
| $SWC_1-$    | 0.417        | 0.345        | 0.369       | 0.336       | 0.359   | 0.406   | 0.373  | 0.365  | 0.382    |          |          |          |          |       |
| $SWC_1+$    | 0.384        | 0.334        | 0.331       | 0.316       | 0.306   | 0.345   | 0.365  | 0.320  | 0.340    | 0.365    |          |          |          |       |
| $SWC_2-$    | 0.438        | 0.329        | 0.393       | 0.355       | 0.374   | 0.394   | 0.367  | 0.386  | 0.367    | 0.406    | 0.365    |          |          |       |
| $SWC_2+$    | 0.401        | 0.345        | 0.342       | 0.340       | 0.320   | 0.364   | 0.368  | 0.348  | 0.374    | 0.391    | 0.405    | 0.391    |          |       |
| $SWC_3-$    | 0.450        | 0.347        | 0.407       | 0.359       | 0.374   | 0.391   | 0.377  | 0.394  | 0.363    | 0.416    | 0.383    | 0.438    | 0.401    |       |
| $SWC_3+$    | 0.426        | 0.349        | 0.362       | 0.341       | 0.336   | 0.377   | 0.369  | 0.354  | 0.383    | 0.407    | 0.393    | 0.416    | 0.410    | 0.426 |
