# Supplementary figures and images for: Testing the Robust Yield Estimation Method for Winter Wheat, Corn, Rapeseed, and Sunflower with Different Vegetation Indices and Meteorological Data
Source: MDPI journal article supplement (doi:10.3390/rs14122860), 2022-06-15

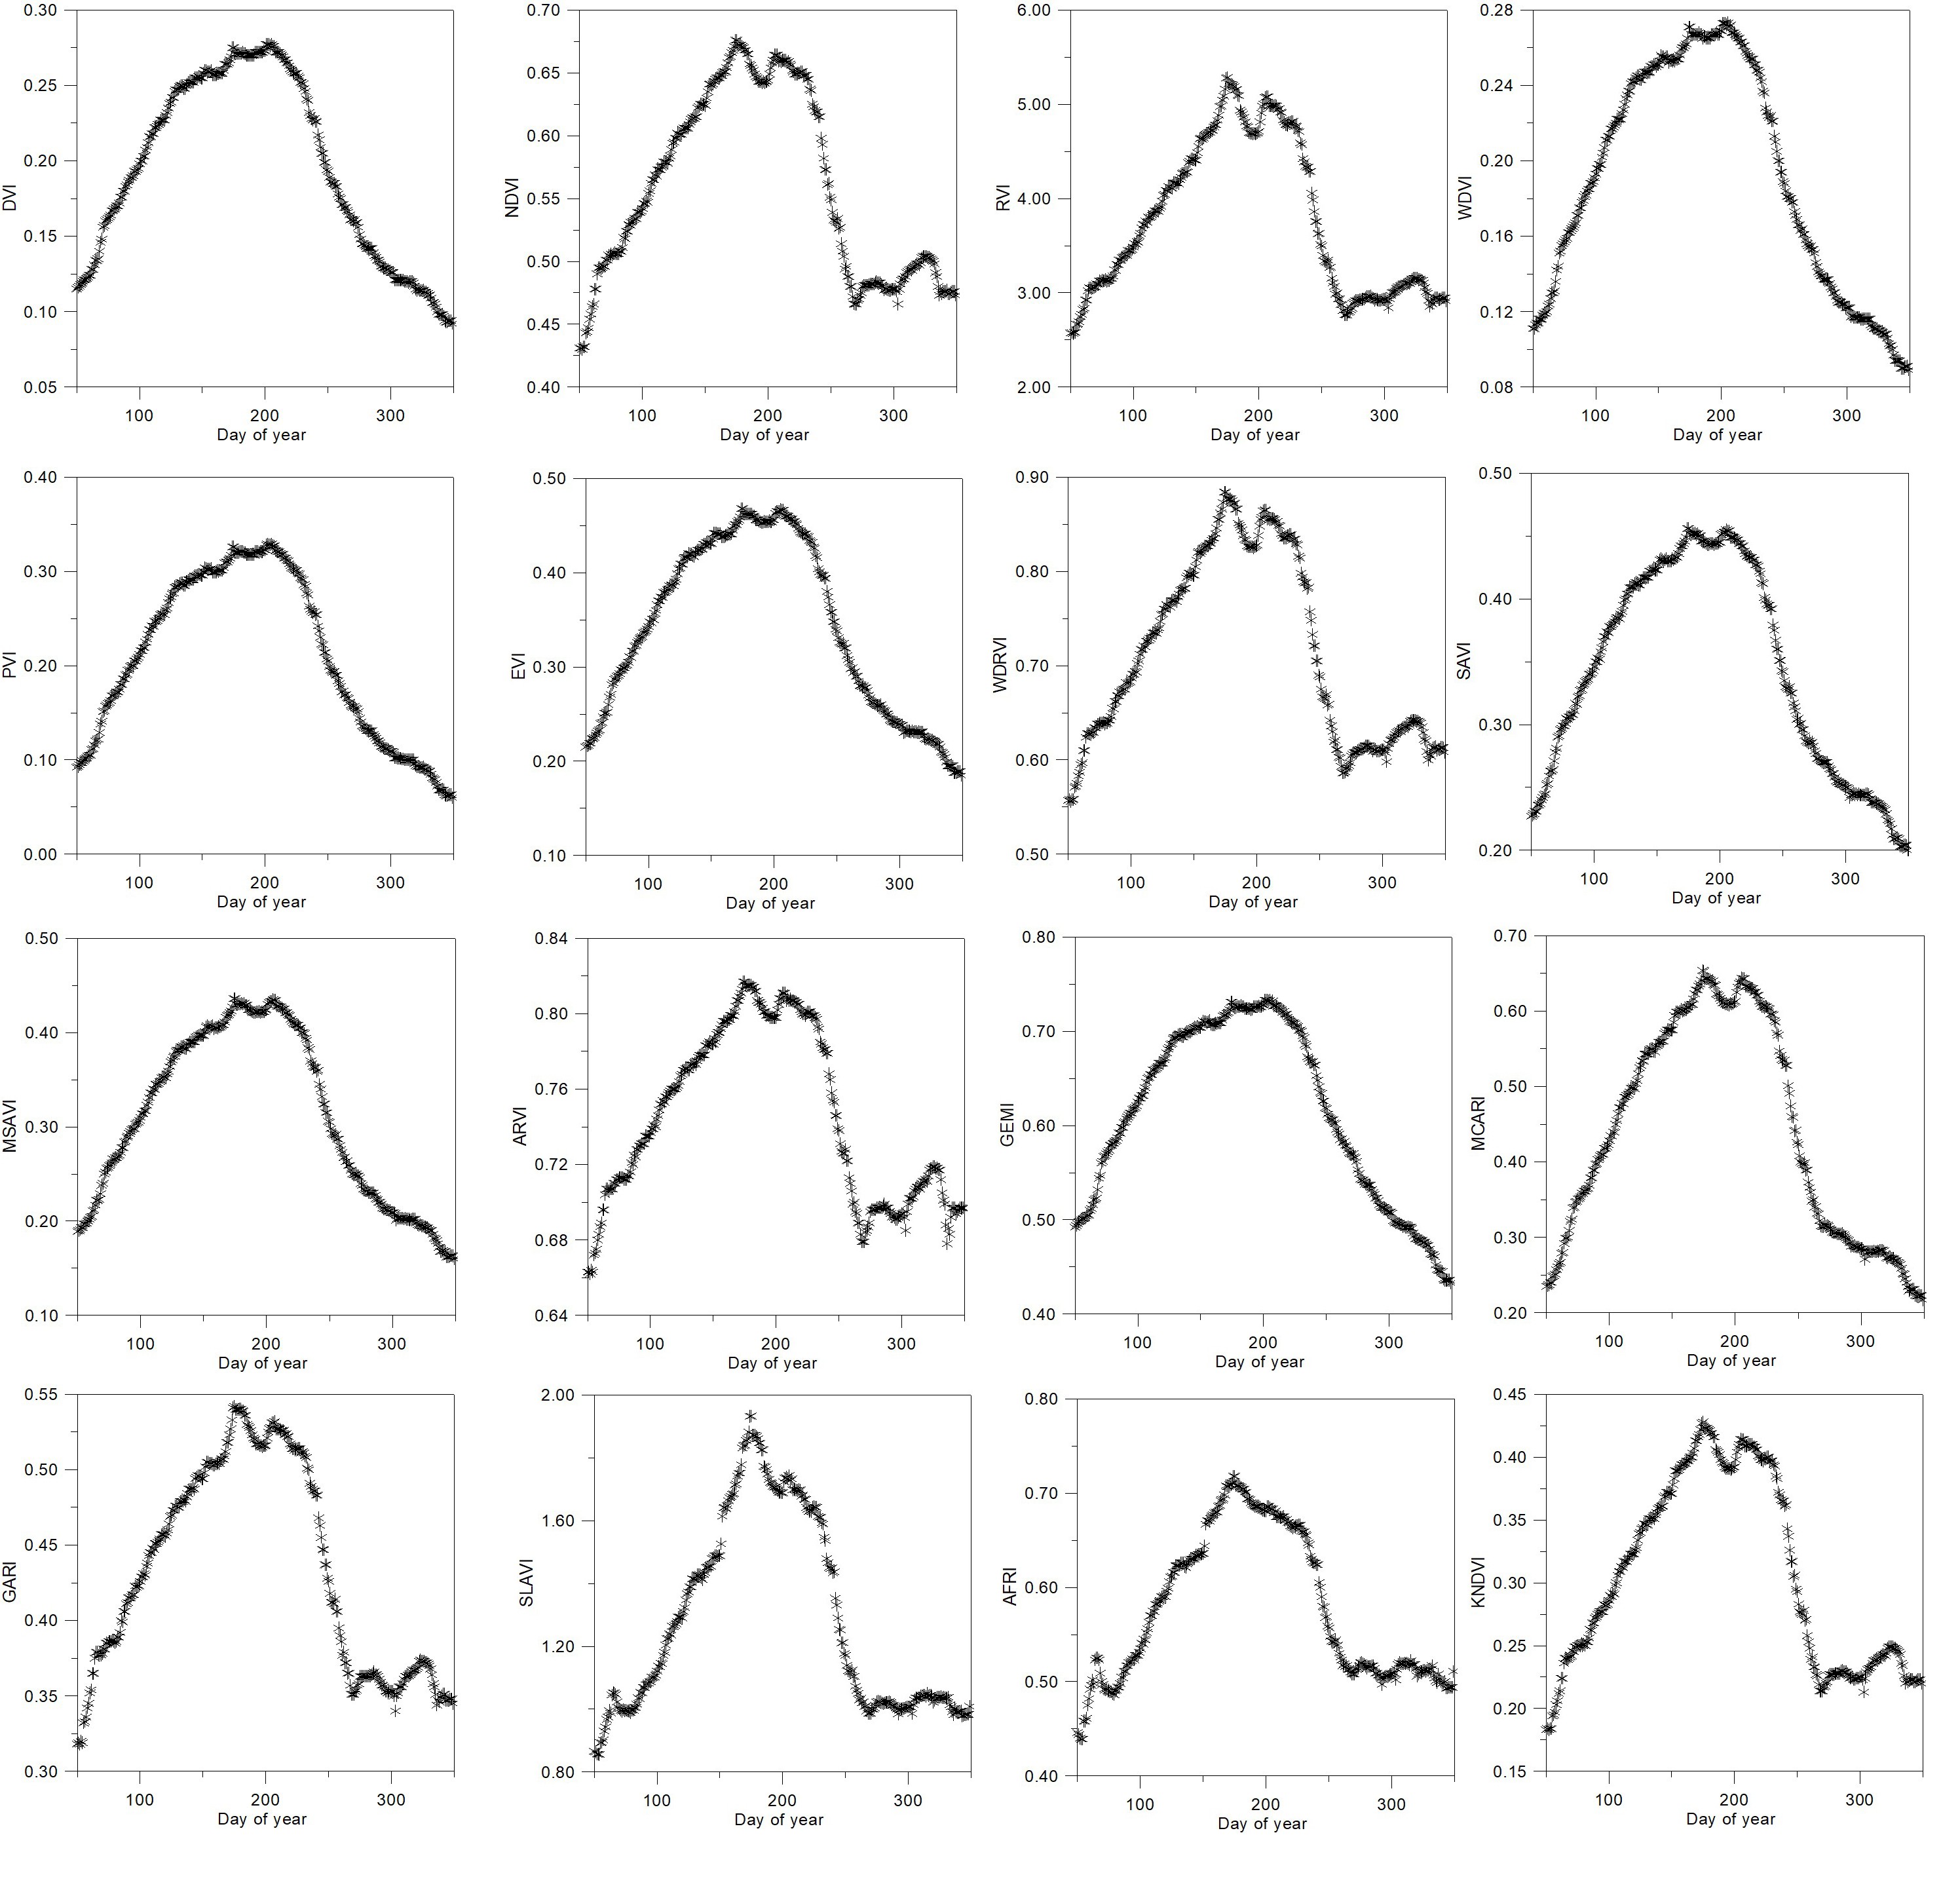

Supplement: s1 [file s1 › Figure S1.jpg]

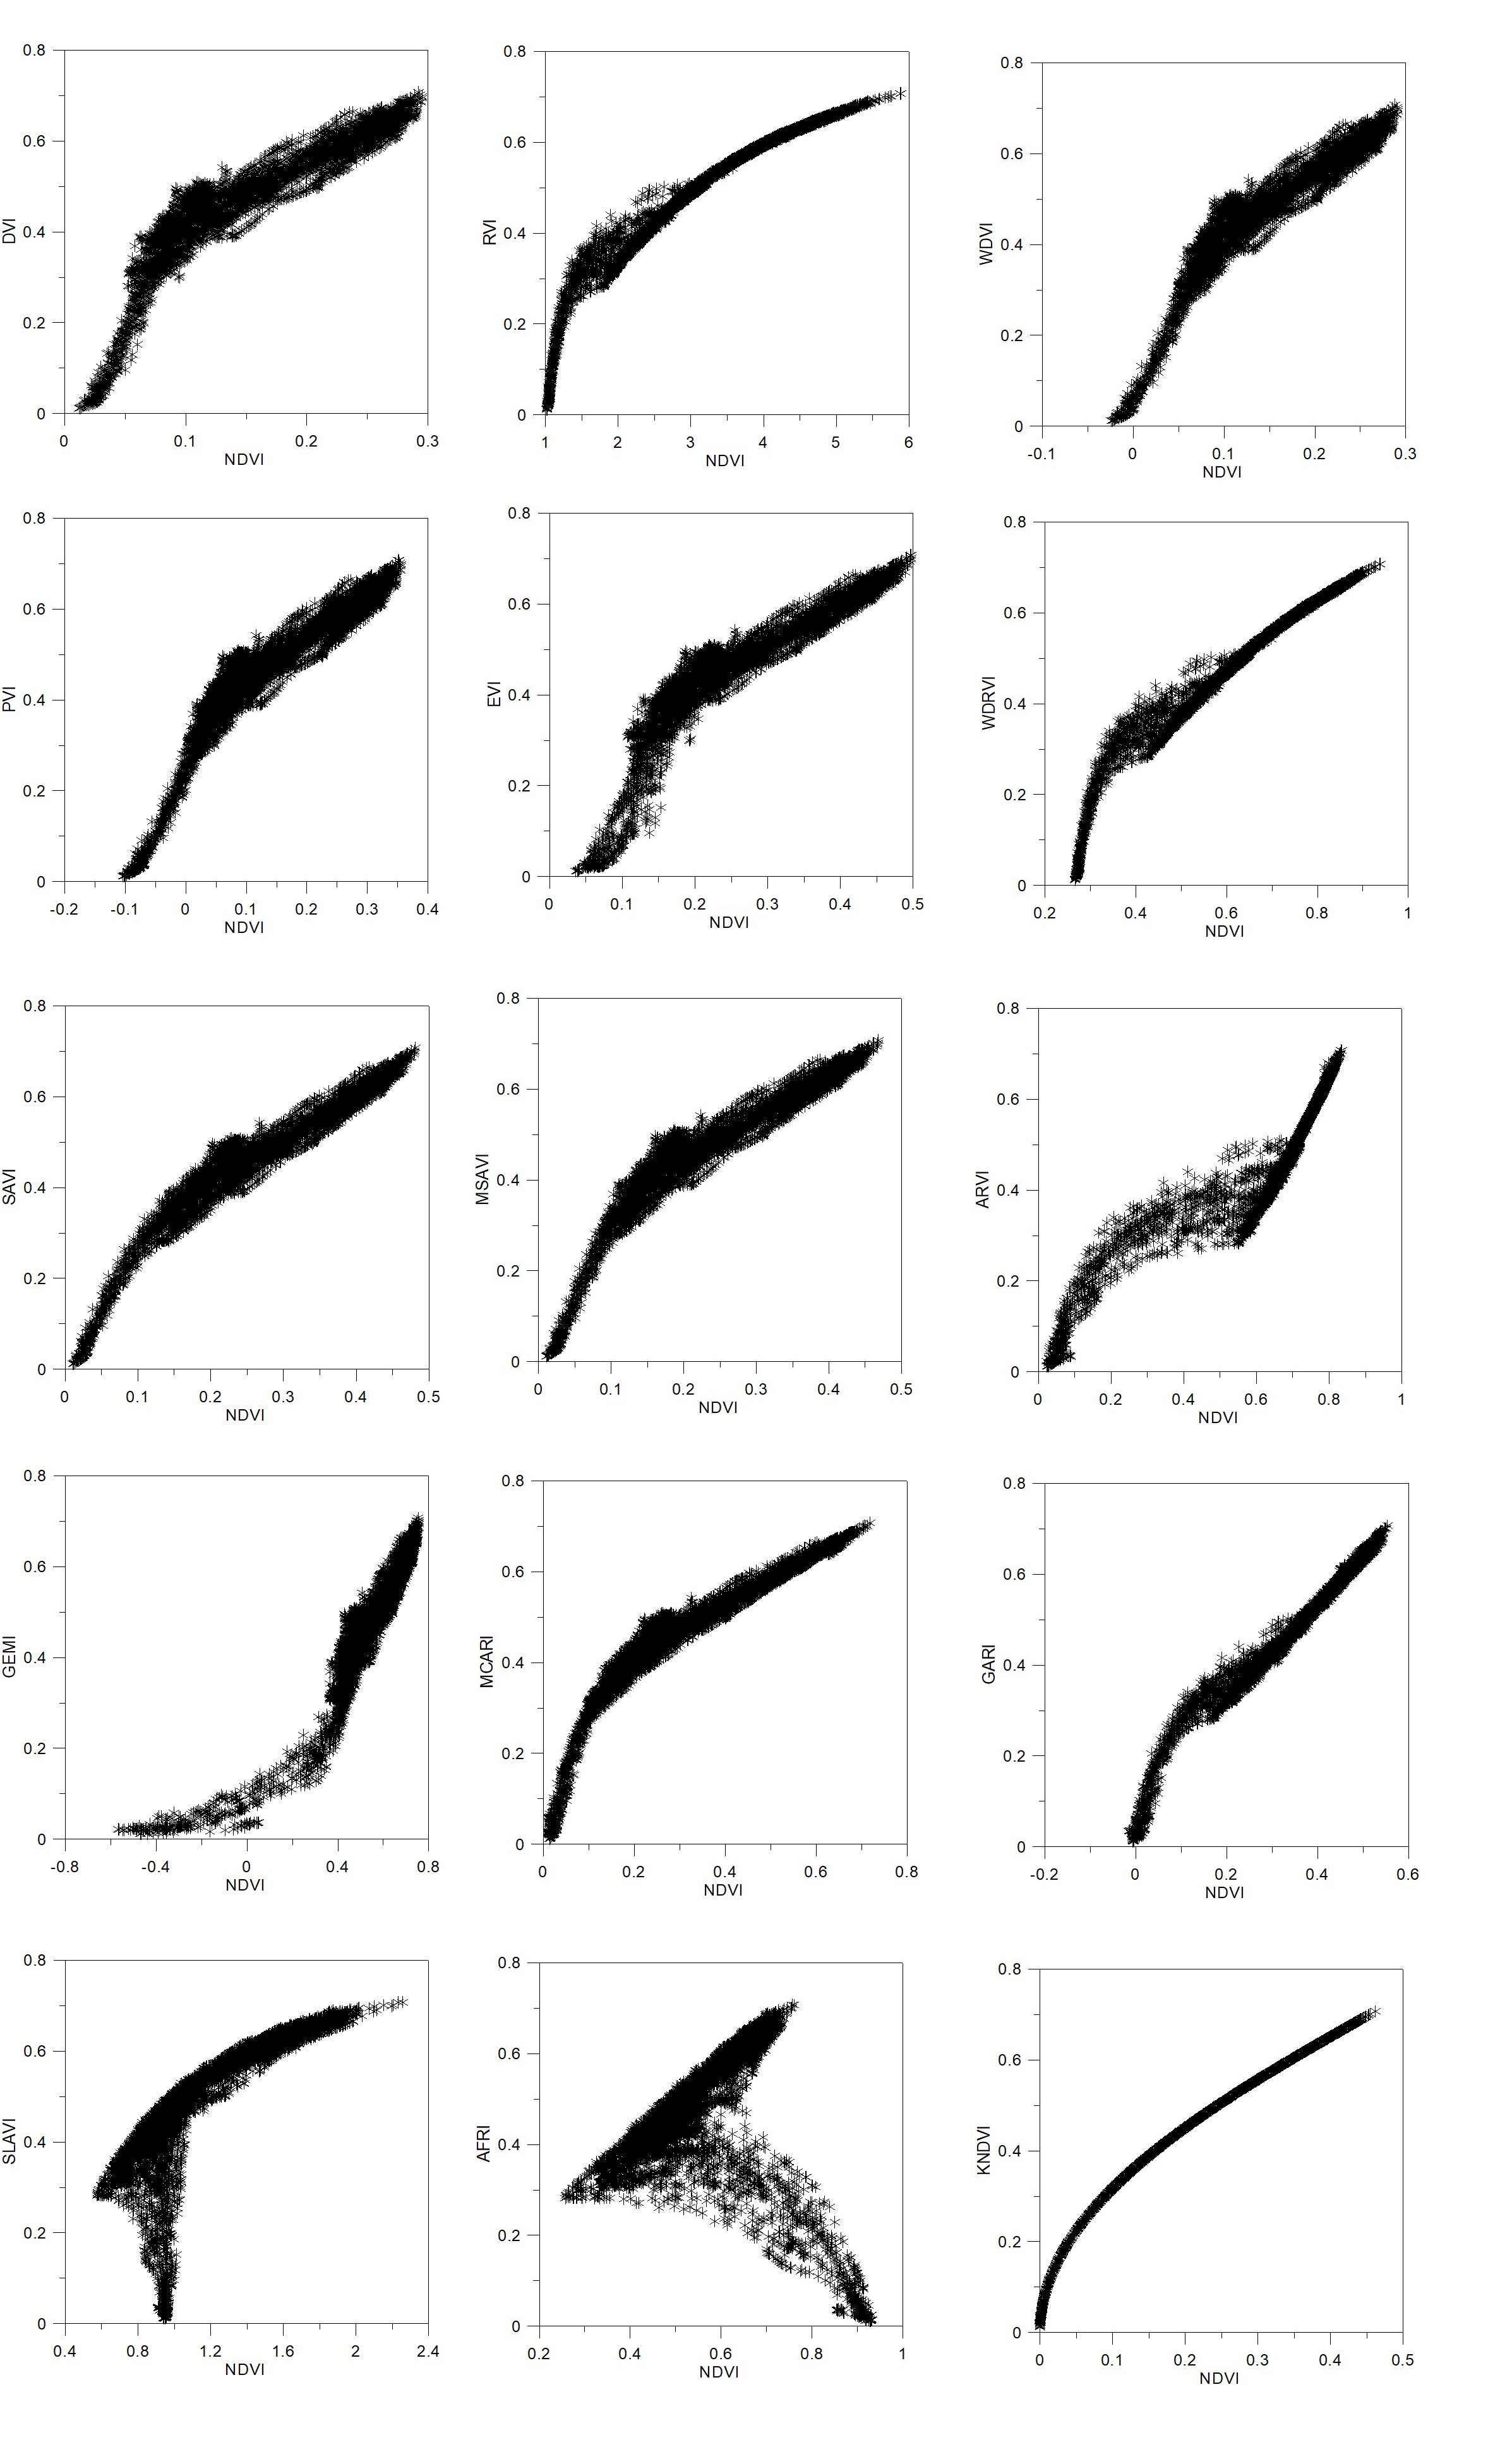

Supplement: s1 [file s1 › Figure S2.jpg]

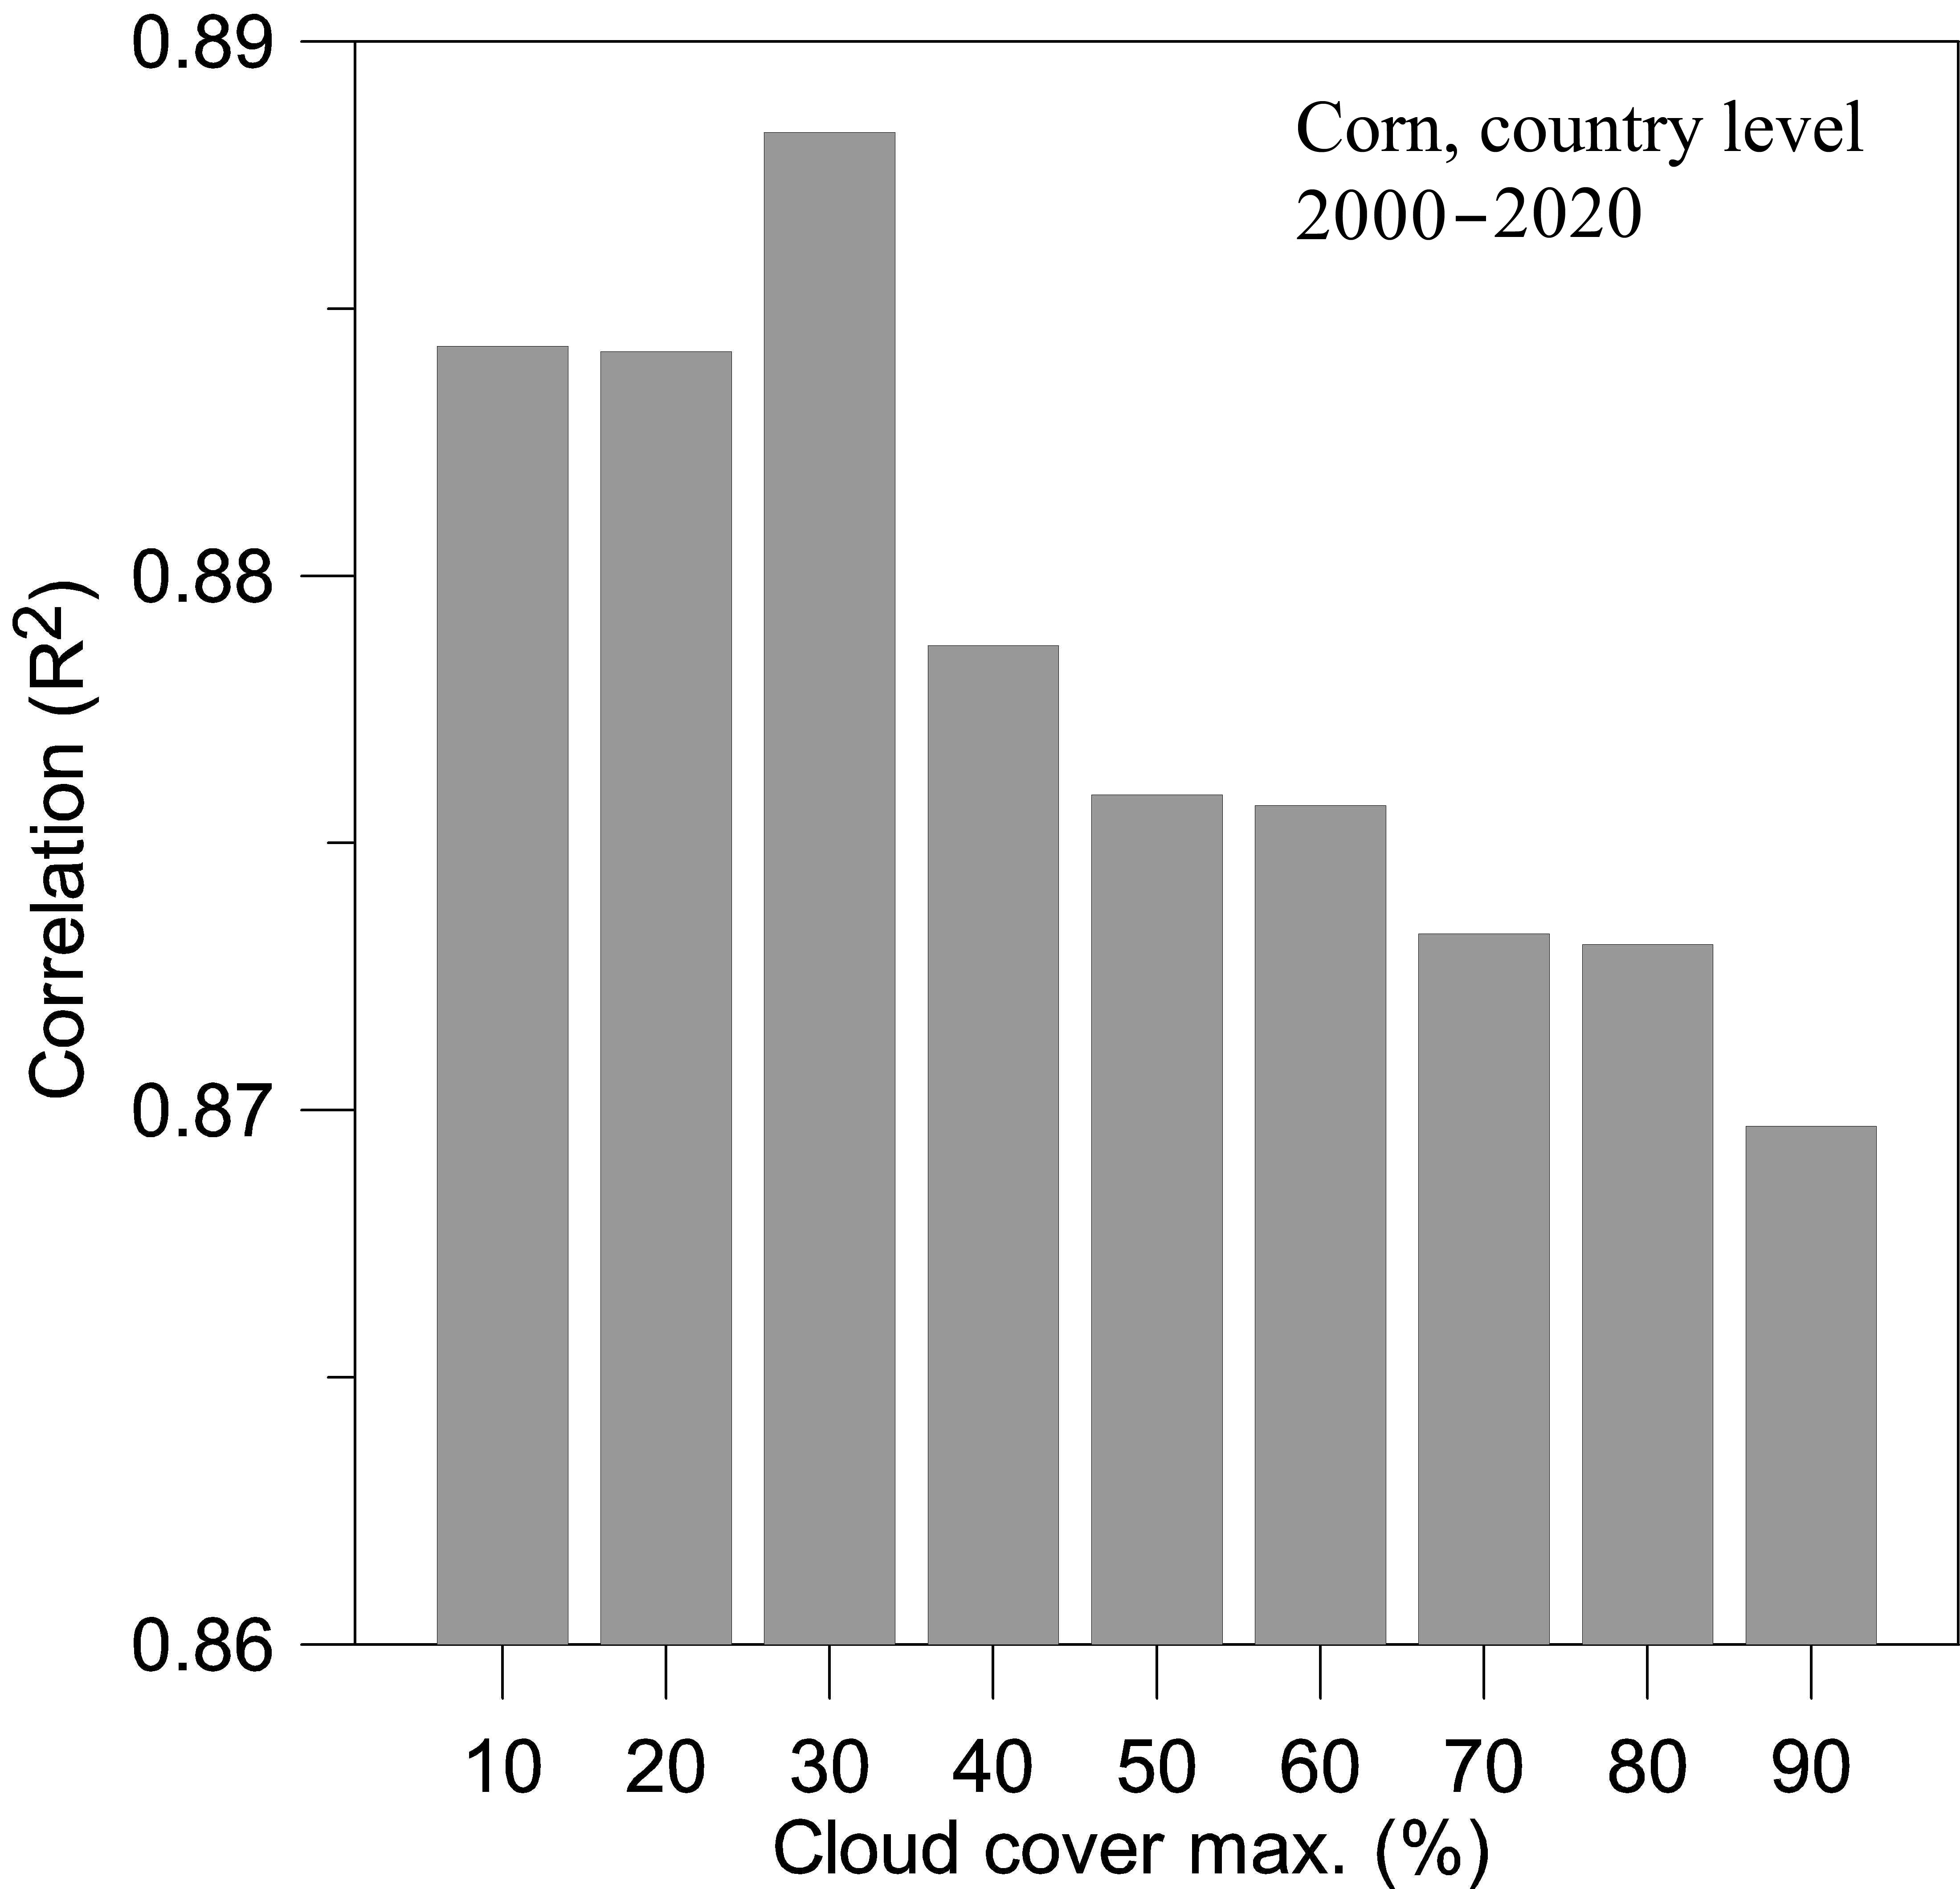

Supplement: s1 [file s1 › Figure S3.jpg]

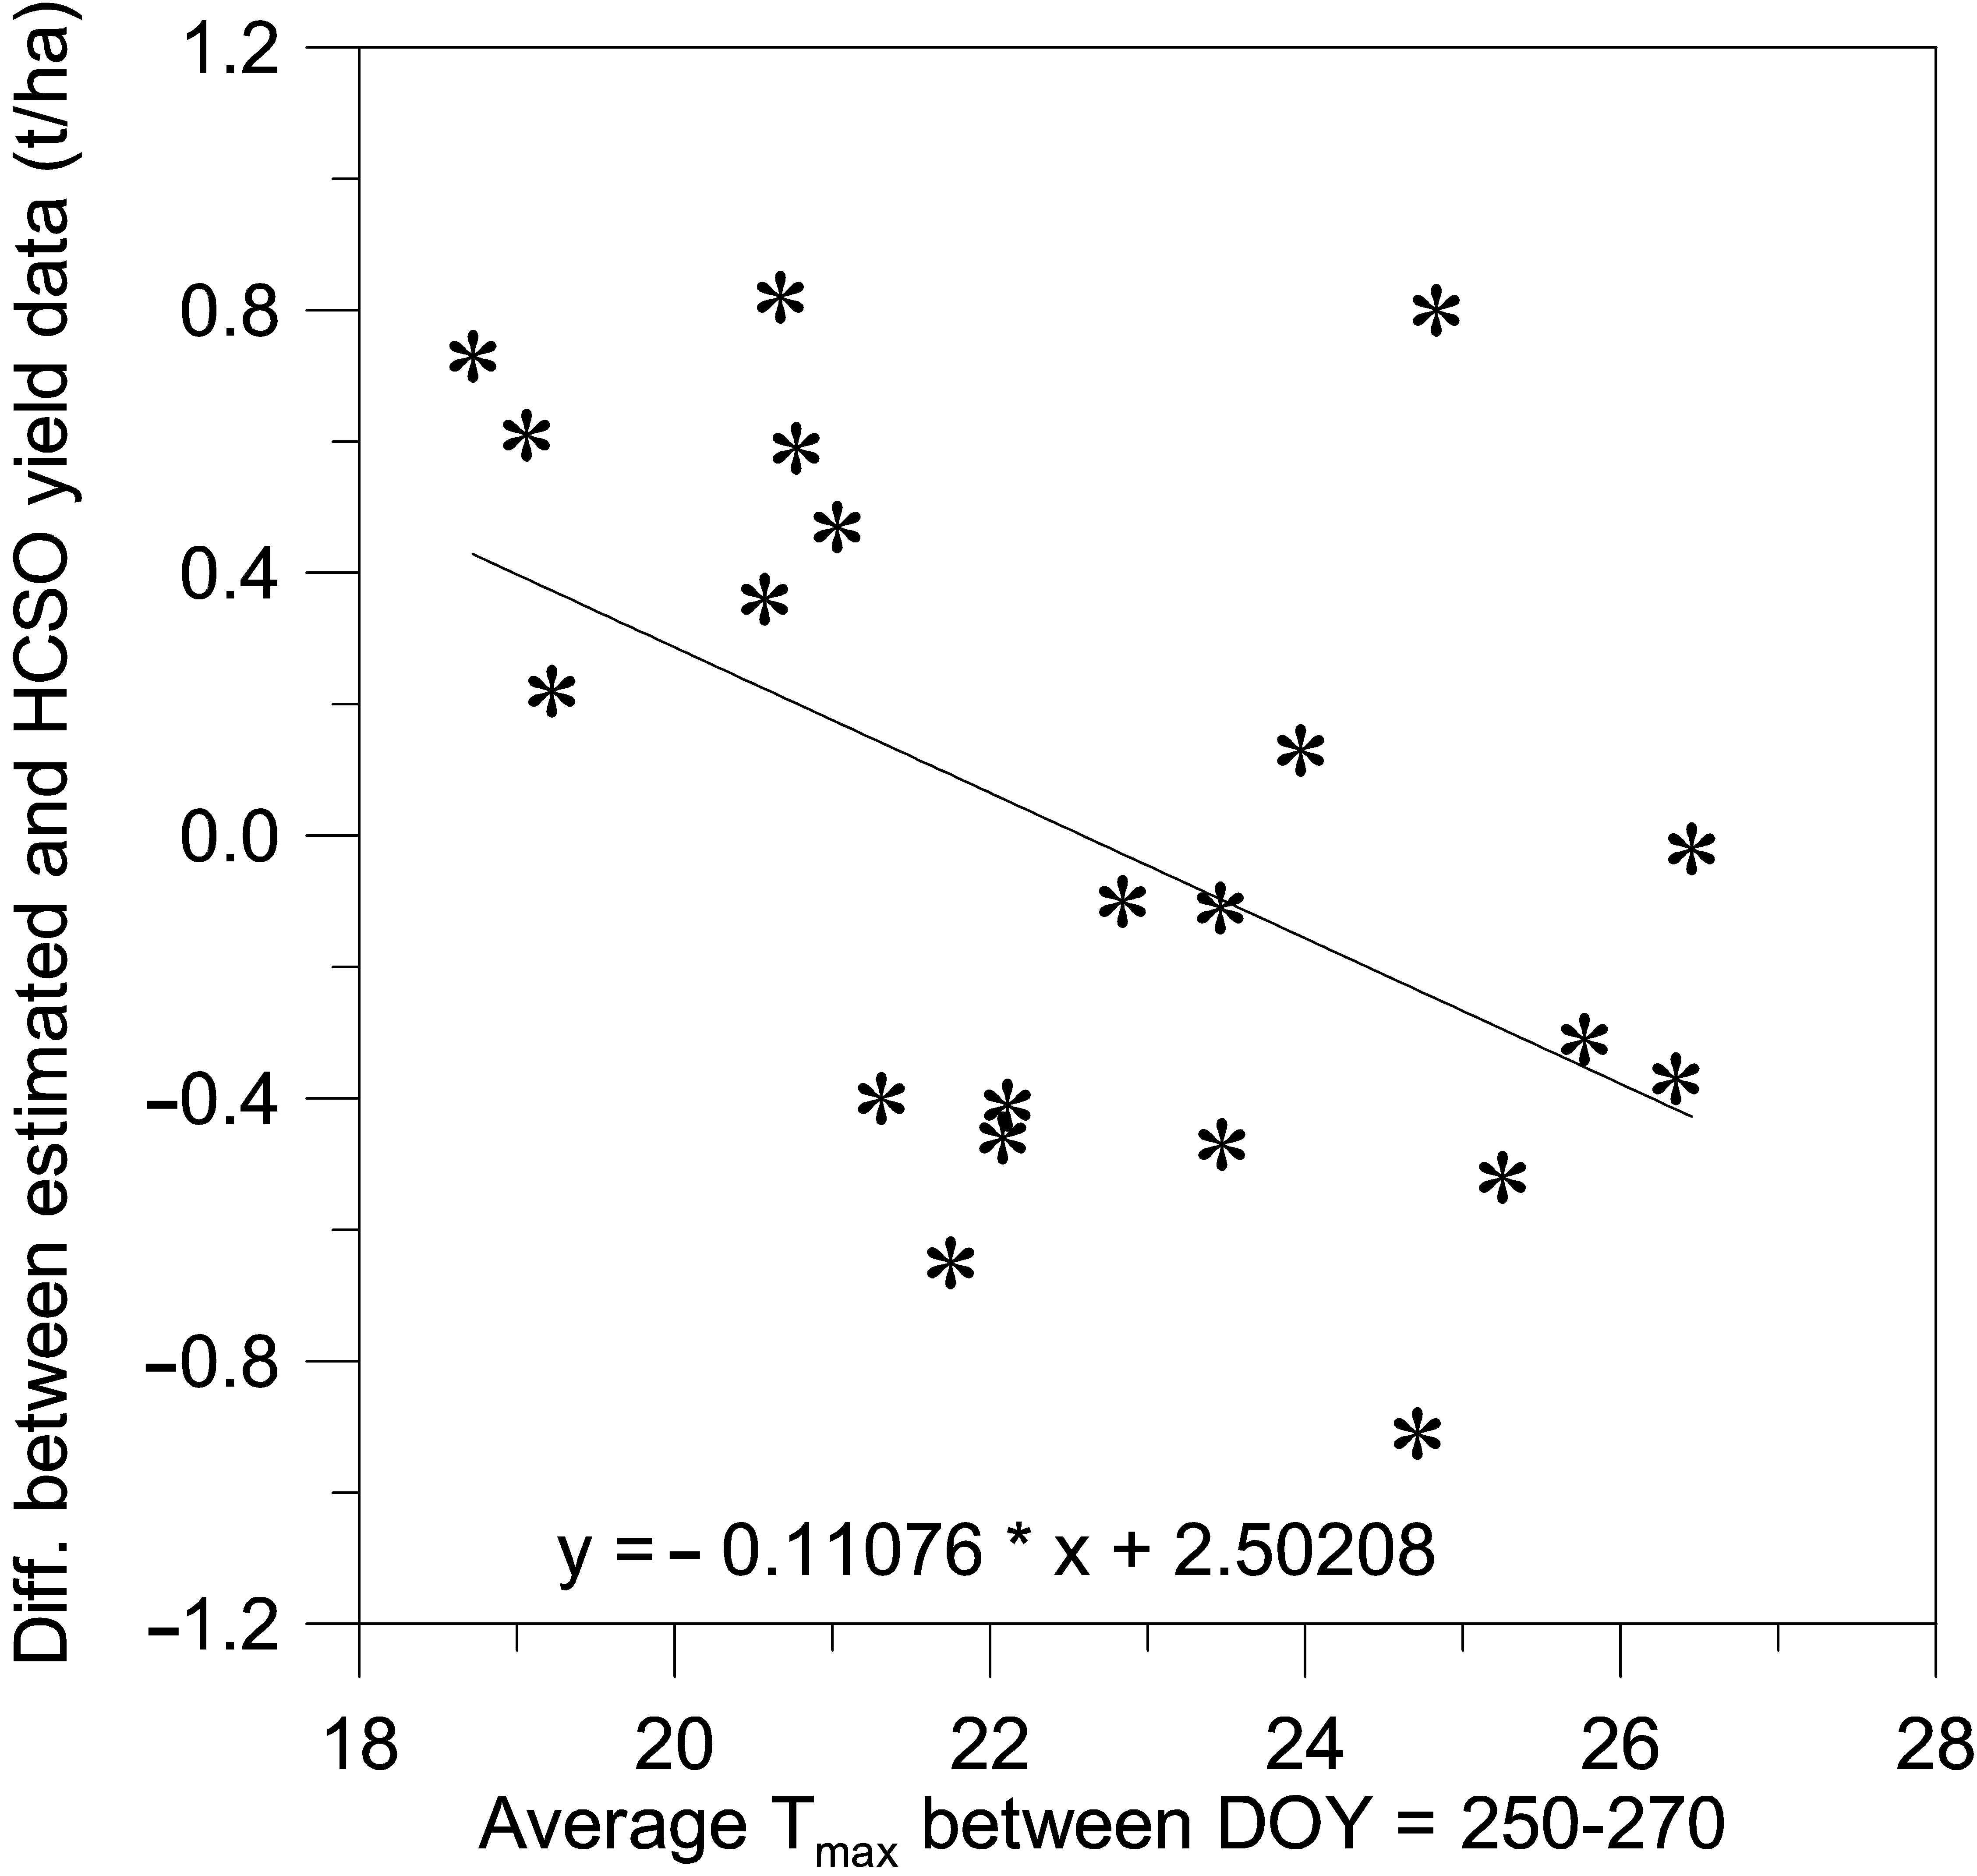

Supplement: s1 [file s1 › Figure S4.jpg]

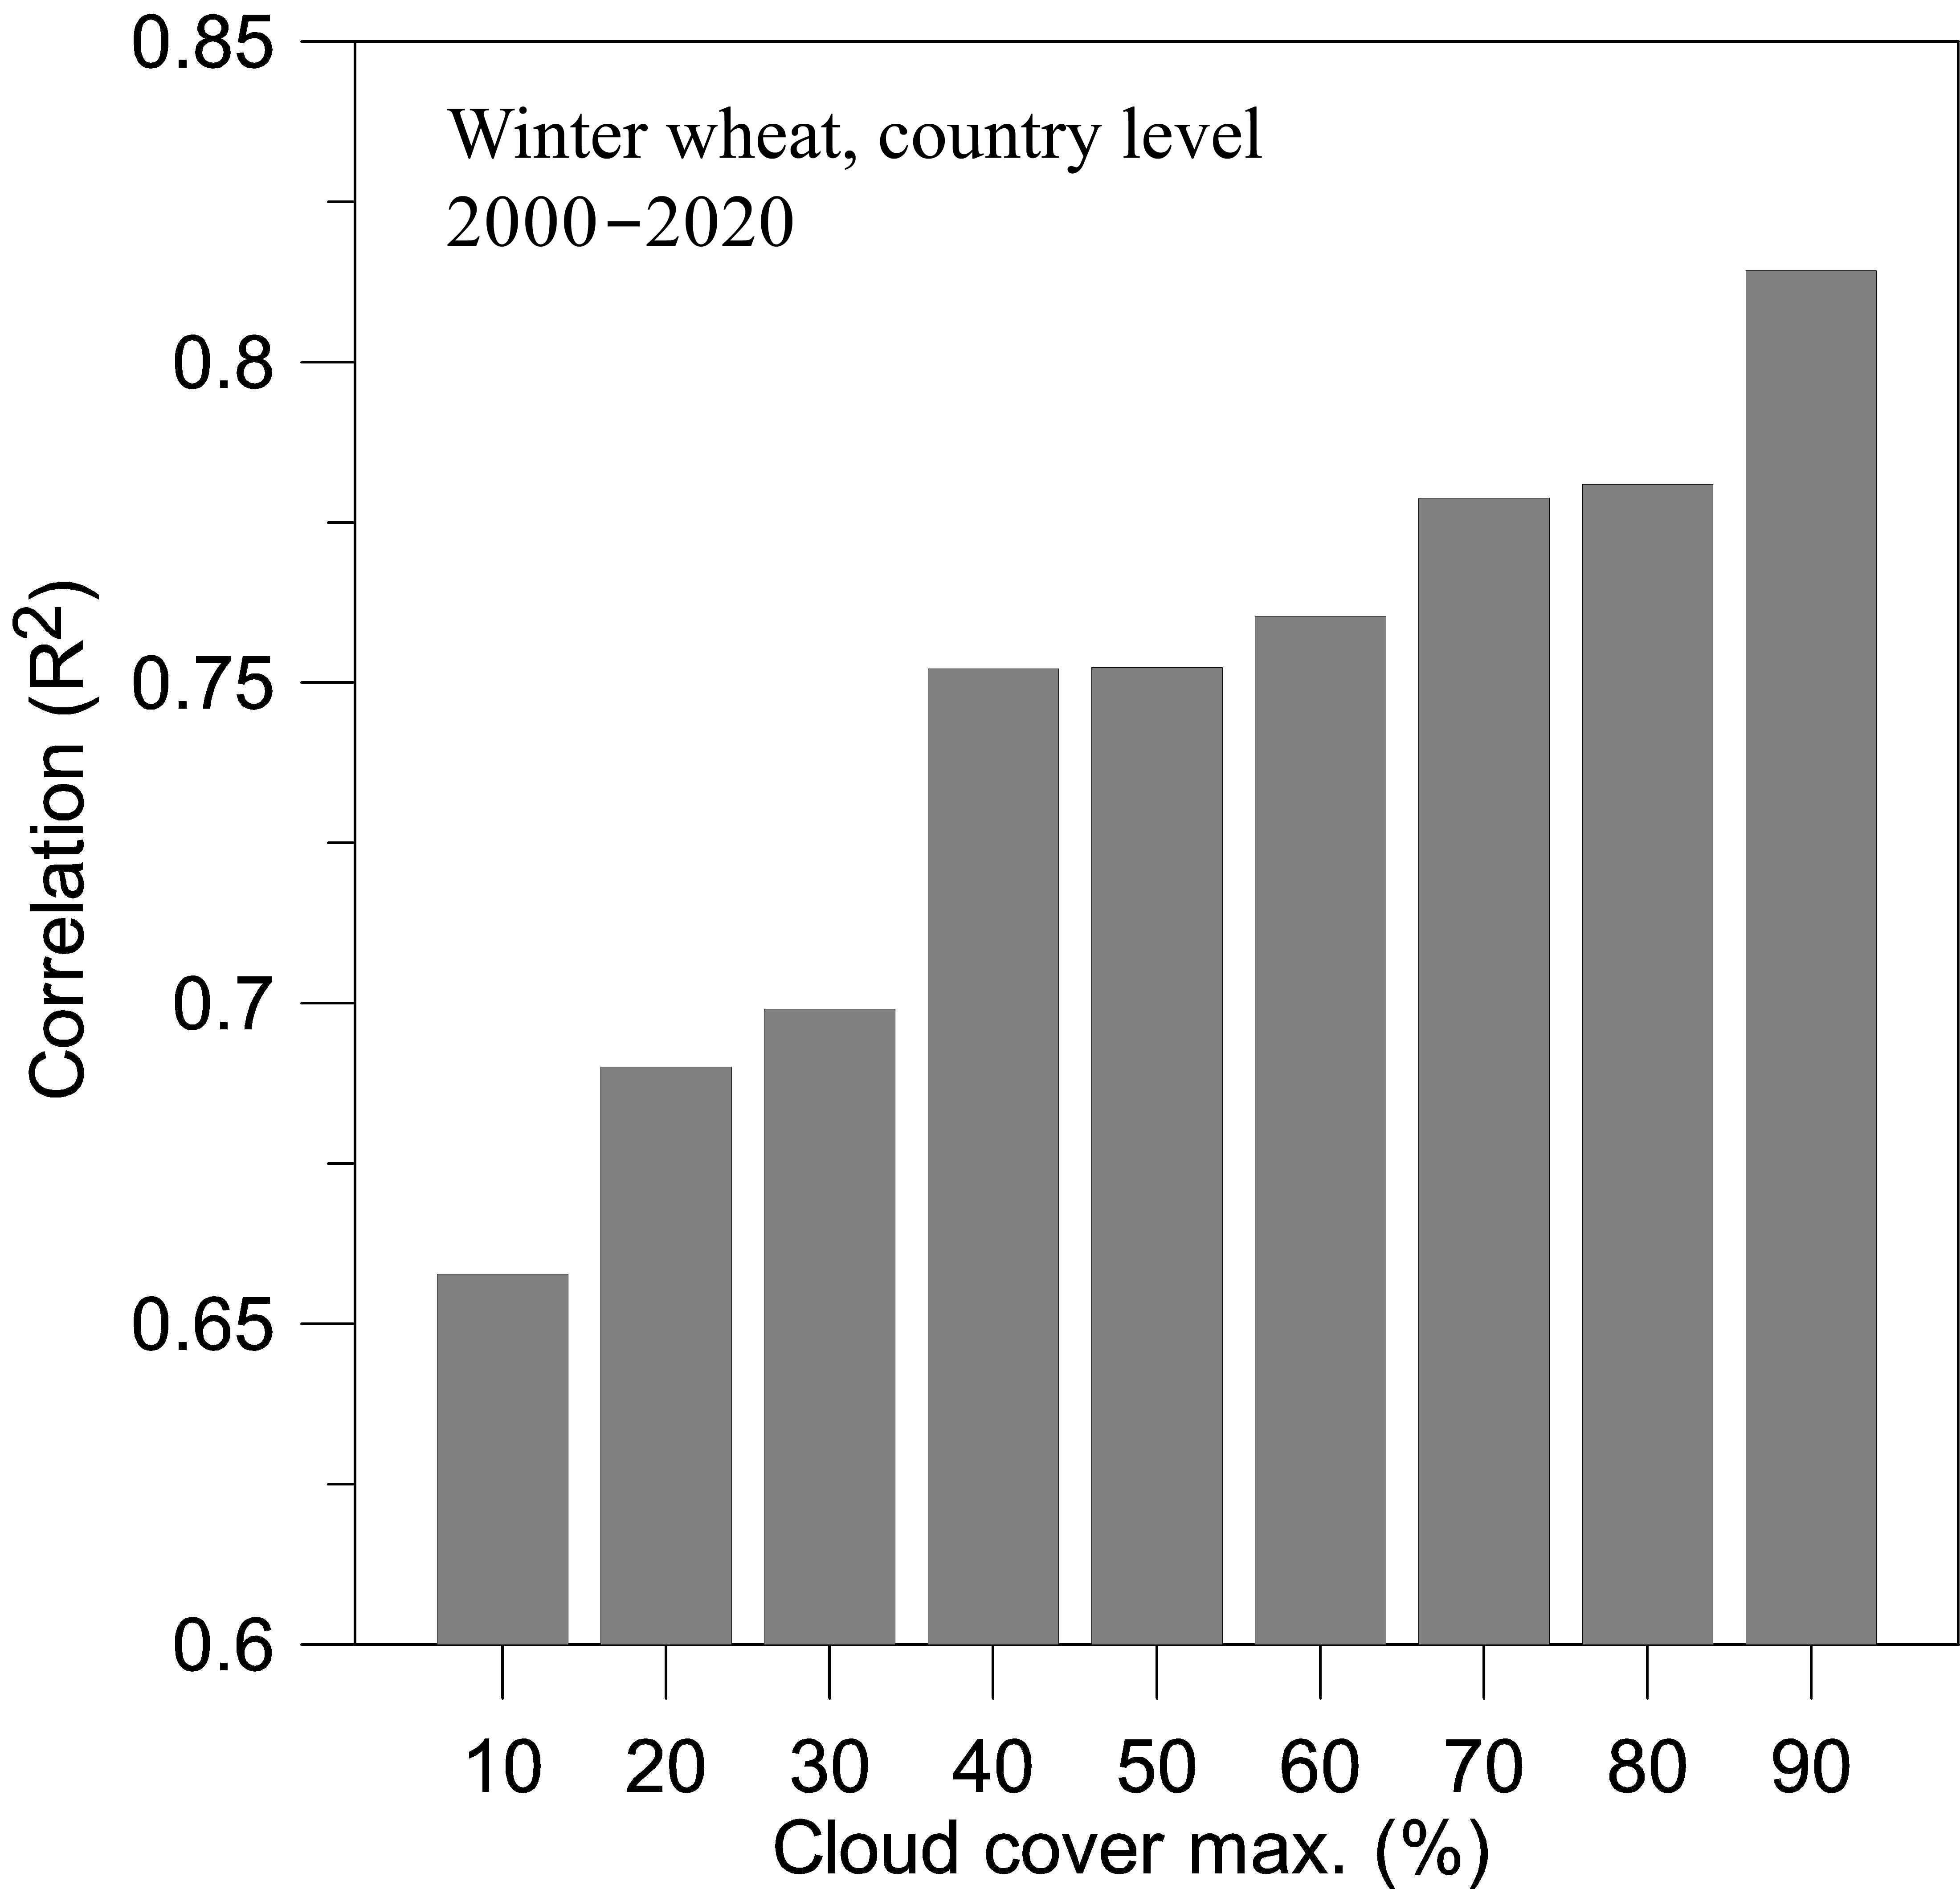

Supplement: s1 [file s1 › Figure S5.jpg]

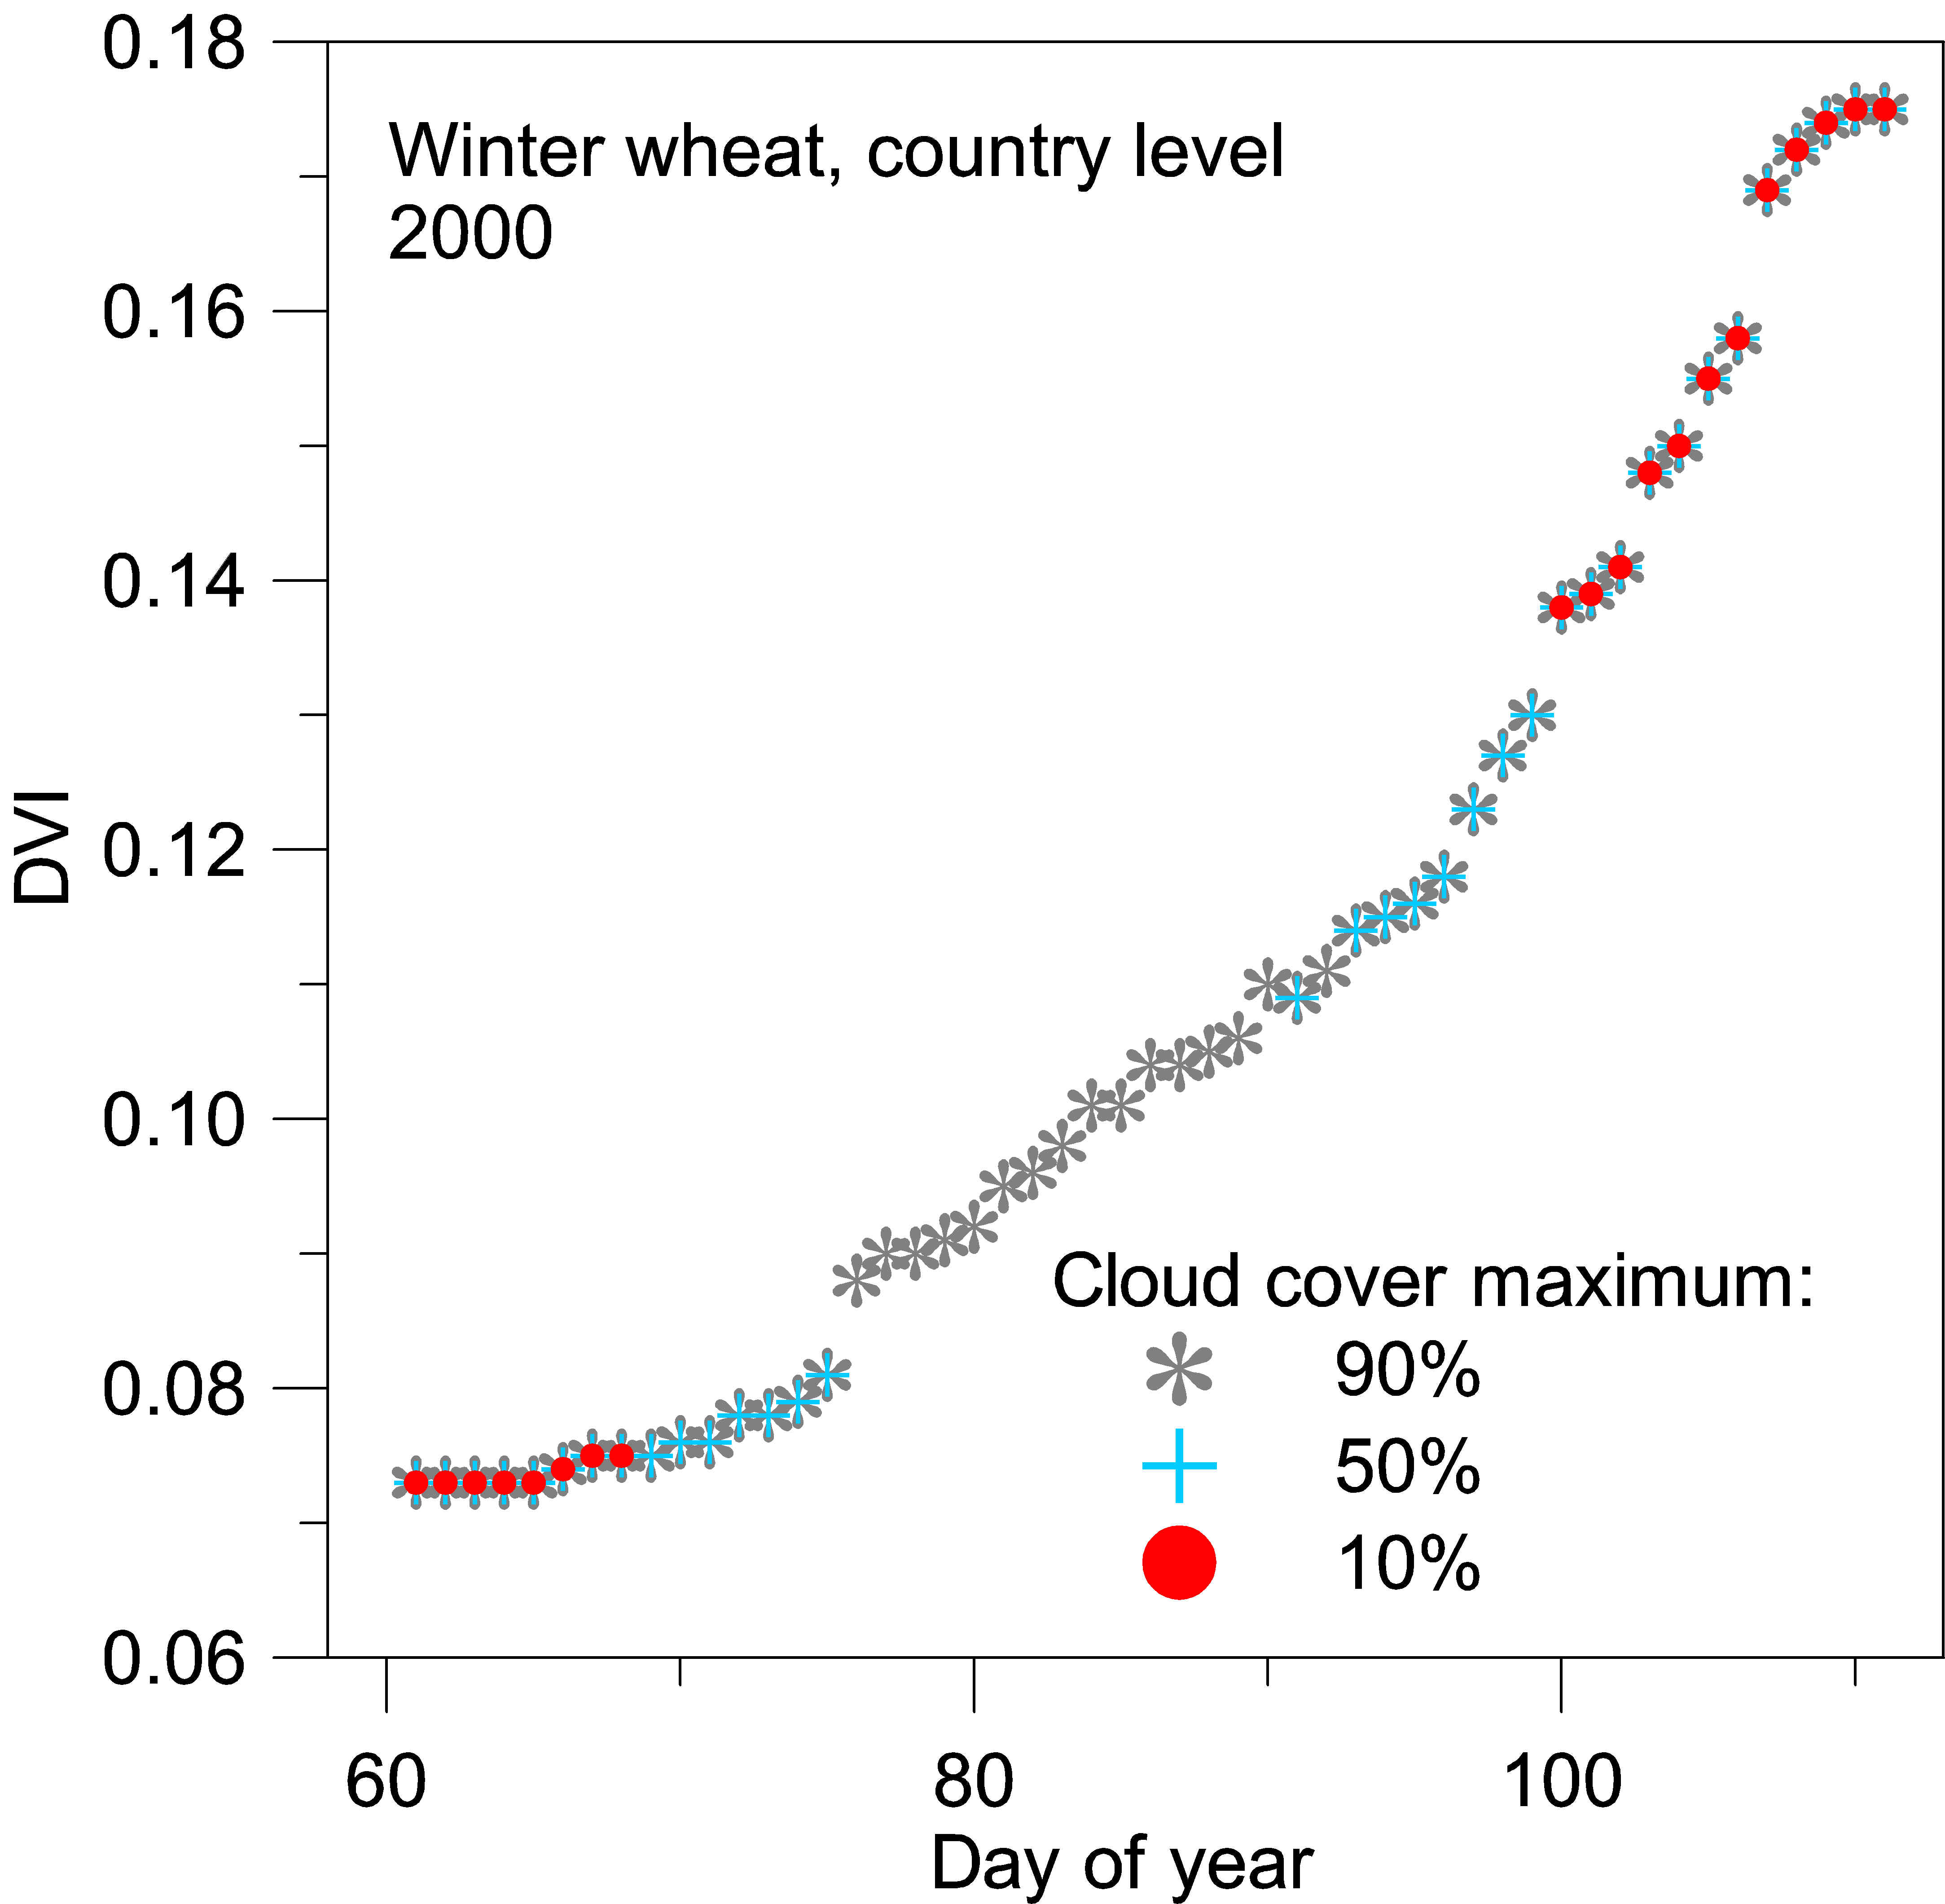

Supplement: s1 [file s1 › Figure S6.jpg]

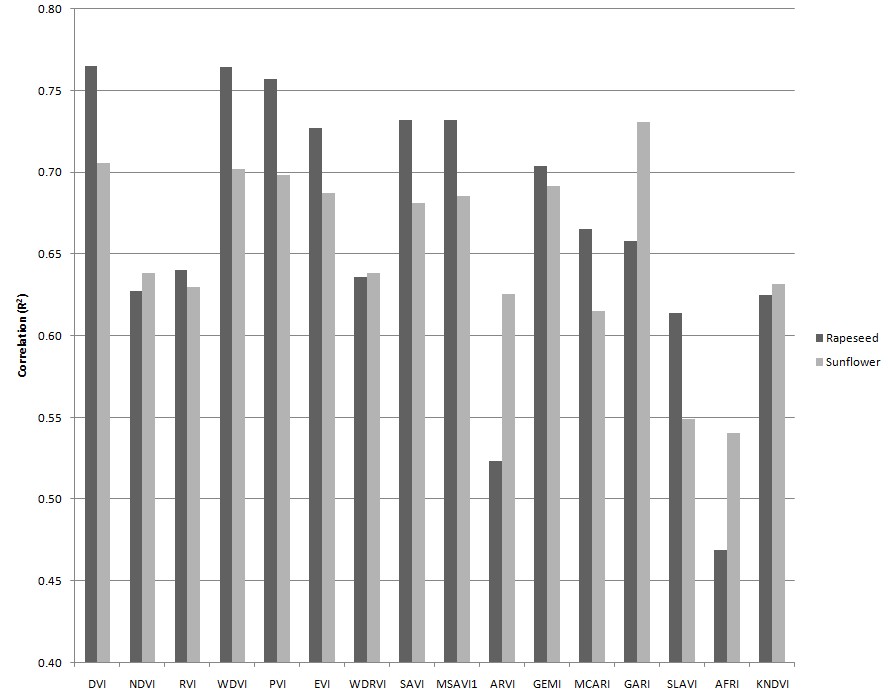

Supplement: s1 [file s1 › Figure S7.jpg]
